# Supplementary material
Source: PubMed Central journal article supplement (PMC7858693)
Supplement: NIHMS1591462-supplement-1.pdf [file NIHMS1591462-supplement-1.pdf]

# EFFECTS OF FOLIC ACID WITHDRAWAL ON TRANSCRIPTOMIC PROFILES IN MURINE TRIPLE-NEGATIVE BREAST CANCER CELL LINES

Supplementary Table 1: Joined pathway analysis

| Pathways                                            | Total | Hits | Raw P-value | minus log P-value | FDR      | Impact | Hits – metabolites                                                                                                                                                           | Hits – genes                                                     |
|-----------------------------------------------------|-------|------|-------------|-------------------|----------|--------|------------------------------------------------------------------------------------------------------------------------------------------------------------------------------|------------------------------------------------------------------|
| <b>E-Wnt</b>                                        |       |      |             |                   |          |        |                                                                                                                                                                              |                                                                  |
| Pantothenate and CoA biosynthesis                   | 46    | 4    | 7.9E-06     | 11.8              | 2.58E-03 | 0.17   | beta-Alanine; Aspartate                                                                                                                                                      | <i>Vnn1; Vnn3</i>                                                |
| <b>M-Wnt</b>                                        |       |      |             |                   |          |        |                                                                                                                                                                              |                                                                  |
| JAK-STAT signaling pathway                          | 165   | 5    | 7.0E-04     | 7.3               | 1.20E-02 | 1.14   |                                                                                                                                                                              | <i>Irf9; Stat1; Stat2; Il15; Il19</i>                            |
| Alanine, aspartate and glutamate metabolism         | 66    | 5    | 8.9E-06     | 11.6              | 3.66E-04 | 0.48   | Alanine; Aspartate; Asparagine; Glutamate; Glutamine                                                                                                                         |                                                                  |
| beta-Alanine metabolism                             | 64    | 3    | 2.6E-03     | 5.9               | 2.95E-02 | 0.31   | beta-Alanine; Aspartate; Histidine                                                                                                                                           |                                                                  |
| Phenylalanine, tyrosine and tryptophan biosynthesis | 43    | 3    | 8.2E-04     | 7.1               | 1.28E-02 | 0.29   | Tryptophan; Tyrosine; Phenylalanine                                                                                                                                          |                                                                  |
| Pyrimidine metabolism                               | 123   | 4    | 1.9E-03     | 6.3               | 2.60E-02 | 0.26   | UDP-glucose; beta-Alanine; Glutamine                                                                                                                                         | <i>Cmpk2</i>                                                     |
| Prolactin signaling pathway                         | 83    | 4    | 4.4E-04     | 7.7               | 9.55E-03 | 0.26   | Tyrosine; ATP; Glucose                                                                                                                                                       | <i>Stat1</i>                                                     |
| D-Glutamine and D-glutamate metabolism              | 17    | 2    | 2.4E-03     | 6.0               | 2.91E-02 | 0.25   | Glutamate; Glutamine                                                                                                                                                         |                                                                  |
| Arginine biosynthesis                               | 42    | 3    | 7.7E-04     | 7.2               | 1.26E-02 | 0.23   | Aspartate; Glutamine; Glutamate                                                                                                                                              |                                                                  |
| Aminoacyl-tRNA biosynthesis                         | 118   | 16   | 1.9E-20     | 45.4              | 3.09E-18 | 0.22   | Tryptophan; Leucine; Tyrosine; Alanine; Isoleucine; Valine; Methionine; Serine; Aspartate; Proline; Glutamate; Glutamine; Phenylalanine; Histidine; Asparagine               | <i>Qrs11</i>                                                     |
| Epstein-Barr virus infection                        | 232   | 8    | 6.0E-06     | 12.0              | 2.81E-04 | 0.21   |                                                                                                                                                                              | <i>Stat1; Stat2; Blnk; Irf9; Oas2; H2-D1; H2-K1; H2-Q7</i>       |
| Herpes simplex virus 1 infection                    | 439   | 9    | 9.4E-05     | 9.3               | 2.80E-03 | 0.16   |                                                                                                                                                                              | <i>Ccl5; Oas2; Stat1; Stat2; Irf9; Bst2; H2-D1; H2-K1; H2-Q7</i> |
| Galactose metabolism                                | 78    | 3    | 4.6E-03     | 5.4               | 4.15E-02 | 0.15   | Myo-Inositol; UDP-Glucose; Glucose                                                                                                                                           |                                                                  |
| Hepatitis C                                         | 162   | 5    | 6.4E-04     | 7.4               | 1.16E-02 | 0.15   |                                                                                                                                                                              | <i>Stat1; Stat2; Irf9; Oas2; Rsad2</i>                           |
| Valine, leucine and isoleucine biosynthesis         | 27    | 3    | 2.1E-04     | 8.5               | 5.59E-03 | 0.15   | Leucine; Isoleucine; Valine                                                                                                                                                  |                                                                  |
| Taurine and hypotaurine metabolism                  | 33    | 3    | 3.8E-04     | 7.9               | 8.78E-03 | 0.14   | Alanine; Taurine; Glutamate                                                                                                                                                  |                                                                  |
| Histidine metabolism                                | 71    | 3    | 3.5E-03     | 5.7               | 3.59E-02 | 0.13   | Aspartate; Glutamate; Histidine                                                                                                                                              |                                                                  |
| Pantothenate and CoA biosynthesis                   | 46    | 3    | 1.0E-03     | 6.9               | 1.49E-02 | 0.12   | Valine; beta-Alanine; Aspartate                                                                                                                                              |                                                                  |
| Osteoclast differentiation                          | 131   | 4    | 2.4E-03     | 6.0               | 2.91E-02 | 0.12   |                                                                                                                                                                              | <i>Stat1; Stat2; Irf9; Blnk</i>                                  |
| Influenza A                                         | 169   | 6    | 8.2E-05     | 9.4               | 2.70E-03 | 0.12   |                                                                                                                                                                              | <i>Stat1; Stat2; Irf9; Oas2; Ccl5; Rsad2</i>                     |
| Glycine, serine and threonine metabolism            | 90    | 4    | 6.0E-04     | 7.4               | 1.15E-02 | 0.11   | Creatine; Serine; Aspartate; Tryptophan                                                                                                                                      |                                                                  |
| Human papillomavirus infection                      | 364   | 6    | 4.6E-03     | 5.4               | 4.15E-02 | 0.11   |                                                                                                                                                                              | <i>Stat2; Stat1; Irf9; H2-D1; H2-K1; H2-Q7</i>                   |
| Arginine and proline metabolism                     | 128   | 4    | 2.2E-03     | 6.1               | 2.89E-02 | 0.10   | Creatine; Phosphocreatine; Glutamate; Proline                                                                                                                                |                                                                  |
| Measles                                             | 145   | 4    | 3.5E-03     | 5.7               | 3.59E-02 | 0.10   |                                                                                                                                                                              | <i>Stat1; Stat2; Irf9; Oas2</i>                                  |
| Glyoxylate and dicarboxylate metabolism             | 93    | 5    | 4.8E-05     | 10.0              | 1.73E-03 | 0.08   | Formate; cis-Aconitate; Serine; Glutamate; Glutamine                                                                                                                         |                                                                  |
| Cysteine and methionine metabolism                  | 115   | 4    | 1.5E-03     | 6.5               | 2.12E-02 | 0.08   | Serine; Methionine; Alanine; Aspartate                                                                                                                                       |                                                                  |
| Kaposi sarcoma-associated herpesvirus infection     | 221   | 6    | 3.6E-04     | 7.9               | 8.78E-03 | 0.08   |                                                                                                                                                                              | <i>Stat2; Stat1; Irf9; H2-D1; H2-K1; H2-Q7</i>                   |
| Ascorbate and aldarate metabolism                   | 76    | 3    | 4.3E-03     | 5.5               | 4.09E-02 | 0.07   | Myo-Inositol; UDP-Glucose; UDP-Glucuronate                                                                                                                                   |                                                                  |
| Nitrogen metabolism                                 | 36    | 3    | 4.9E-04     | 7.6               | 9.96E-03 | 0.07   | Glutamine; Glutamate; Formate                                                                                                                                                |                                                                  |
| NOD-like receptor signaling pathway                 | 215   | 8    | 3.4E-06     | 12.6              | 1.86E-04 | 0.06   | ATP                                                                                                                                                                          | <i>Stat1; Stat2; Ifi204; Irf9; Ccl5; Gbp5; Oas2</i>              |
| Graft-versus-host disease                           | 67    | 3    | 3.0E-03     | 5.8               | 3.25E-02 | 0.04   |                                                                                                                                                                              | <i>H2-D1; H2-K1; H2-Q7</i>                                       |
| Central carbon metabolism in cancer                 | 104   | 16   | 2.2E-21     | 47.5              | 7.33E-19 | 0.00   | Glucose; Glutamine; Glutamate; Serine; Leucine; Isoleucine; Phenylalanine; Methionine; Alanine; Asparagine; Aspartate; Proline; Tyrosine; Histidine; Tryptophan; Valine      |                                                                  |
| Protein digestion and absorption                    | 141   | 16   | 3.7E-19     | 42.5              | 4.00E-17 | 0.00   | Glutamate; Glutamine; Aspartate; Proline; Alanine; Phenylalanine; Valine; Leucine; Isoleucine; Methionine; Tryptophan; Serine; Asparagine; Histidine; Tyrosine; beta-Alanine |                                                                  |
| Mineral absorption                                  | 81    | 12   | 6.0E-16     | 35.1              | 4.88E-14 | 0.00   | Glucose; Valine; Leucine; Isoleucine; Proline; Tryptophan; Serine; Asparagine; Glutamine; Alanine; Methionine; Phenylalanine                                                 |                                                                  |
| ABC transporters                                    | 186   | 15   | 1.0E-15     | 34.5              | 6.64E-14 | 0.00   | Taurine; Alanine; Myo-Inositol; Glucose; Aspartate; Glutamine; Glutamate; Histidine; Valine; Leucine; Isoleucine; Proline; Serine; Phenylalanine                             | <i>Abcg1</i>                                                     |
| Allograft rejection                                 | 64    | 3    | 2.6E-03     | 5.9               | 2.95E-02 | 0.00   |                                                                                                                                                                              | <i>H2-D1; H2-K1; H2-Q7</i>                                       |
| Type I diabetes mellitus                            | 73    | 3    | 3.8E-03     | 5.6               | 3.76E-02 | 0.00   |                                                                                                                                                                              | <i>H2-D1; H2-K1; H2-Q7</i>                                       |
| Autoimmune thyroid disease                          | 82    | 3    | 5.3E-03     | 5.2               | 4.65E-02 | 0.00   |                                                                                                                                                                              | <i>H2-D1; H2-K1; H2-Q7</i>                                       |

# EFFECTS OF FOLIC ACID WITHDRAWAL ON TRANSCRIPTOMIC PROFILES IN MURINE TRIPLE-NEGATIVE BREAST CANCER CELL LINES

| Pathway                                     | Metabolites | Genes | FDR     | Metabolites | Genes    | FDR  | Metabolites                                                                                                                        | Genes | Metabolites | Genes        |
|---------------------------------------------|-------------|-------|---------|-------------|----------|------|------------------------------------------------------------------------------------------------------------------------------------|-------|-------------|--------------|
| <b>metM-Wnt</b>                             |             |       |         |             |          |      |                                                                                                                                    |       |             |              |
| Alanine, aspartate and glutamate metabolism | 66          | 5     | 4.3E-06 | 12.4        | 2.36E-04 | 0.46 | Fumarate; Aspartate; Asparagine; Glutamine; Glutamate                                                                              |       |             |              |
| Pyrimidine metabolism                       | 123         | 4     | 1.1E-03 | 6.8         | 2.59E-02 | 0.26 | UDP-glucose; beta-Alanine; Glutamine                                                                                               |       |             | <i>Cmpk2</i> |
| Arginine biosynthesis                       | 42          | 4     | 1.7E-05 | 11.0        | 7.96E-04 | 0.26 | Aspartate; Fumarate; Glutamate; Glutamine                                                                                          |       |             |              |
| D-Glutamine and D-glutamate metabolism      | 17          | 2     | 1.8E-03 | 6.3         | 3.65E-02 | 0.25 | Glutamate; Glutamine                                                                                                               |       |             |              |
| Galactose metabolism                        | 78          | 4     | 2.0E-04 | 8.5         | 7.15E-03 | 0.18 | Mannose; Glucose; UDP-Glucose; Myo-Inositol                                                                                        |       |             |              |
| Valine, leucine and isoleucine biosynthesis | 27          | 3     | 1.3E-04 | 8.9         | 5.44E-03 | 0.15 | Isoleucine; Valine; Leucine                                                                                                        |       |             |              |
| Aminoacyl-tRNA biosynthesis                 | 118         | 12    | 9.5E-15 | 32.3        | 1.55E-12 | 0.13 | Tryptophan; Tyrosine; Leucine; Isoleucine; Valine; Serine; Aspartate; Proline; Glutamate; Glutamine; Asparagine                    |       |             | <i>Gars</i>  |
| Pantothenate and CoA biosynthesis           | 46          | 3     | 6.6E-04 | 7.3         | 1.65E-02 | 0.12 | beta-Alanine; Aspartate; Valine                                                                                                    |       |             |              |
| Glycine, serine and threonine metabolism    | 90          | 4     | 3.4E-04 | 8.0         | 1.01E-02 | 0.11 | Aspartate; Tryptophan; Serine; Creatine                                                                                            |       |             |              |
| Arginine and proline metabolism             | 128         | 4     | 1.3E-03 | 6.7         | 2.80E-02 | 0.10 | Creatine; Phosphocreatine; Glutamate; Proline                                                                                      |       |             |              |
| Pyruvate metabolism                         | 69          | 3     | 2.1E-03 | 6.1         | 4.11E-02 | 0.08 | Formate; Lactate; Fumarate                                                                                                         |       |             |              |
| Ascorbate and aldarate metabolism           | 76          | 3     | 2.8E-03 | 5.9         | 4.85E-02 | 0.07 | Myo-Inositol; UDP-glucuronate; UDP-glucose                                                                                         |       |             |              |
| Nitrogen metabolism                         | 36          | 3     | 3.2E-04 | 8.1         | 1.01E-02 | 0.07 | Formate; Glutamine; Glutamate                                                                                                      |       |             |              |
| Glyoxylate and dicarboxylate metabolism     | 93          | 4     | 3.9E-04 | 7.9         | 1.05E-02 | 0.06 | Formate; Glutamate; Glutamine; Serine                                                                                              |       |             |              |
| Amino sugar and nucleotide sugar metabolism | 157         | 4     | 2.7E-03 | 5.9         | 4.85E-02 | 0.05 | Glucose; Mannose; UDP-Glucose; UDP-glucuronate                                                                                     |       |             |              |
| Central carbon metabolism in cancer         | 104         | 13    | 3.9E-17 | 37.8        | 1.27E-14 | 0.00 | Fumarate; Asparagine; Aspartate; Glucose; Glutamate; Glutamine; Leucine; Isoleucine; Proline; Serine; Tryptophan; Tyrosine; Valine |       |             |              |
| Protein digestion and absorption            | 141         | 12    | 8.3E-14 | 30.1        | 9.09E-12 | 0.00 | Glutamate; Glutamine; Aspartate; Valine; Serine; Proline; Isoleucine; Leucine; Asparagine; Tryptophan; Tyrosine; beta-Alanine      |       |             |              |
| ABC transporters                            | 186         | 12    | 2.3E-12 | 26.8        | 1.90E-10 | 0.00 | Glucose; Glutamate; Aspartate; Glutamine; Valine; Taurine; Myo-Inositol; Leucine; Serine; Proline; Mannose; Isoleucine             |       |             |              |
| Mineral absorption                          | 81          | 9     | 1.3E-11 | 25.1        | 8.35E-10 | 0.00 | Glucose; Valine; Leucine; Isoleucine; Proline; Tryptophan; Serine; Asparagine; Glutamine                                           |       |             |              |

Results of joined pathway analysis based on transcriptomic and metabolomic data. Identified pathways unique for M-Wnt cells are highlighted in orange. Identified pathways unique for metM-Wnt<sup>liver</sup> cells are highlighted in green. Only pathways with a FDR  $P$ -value  $<0.05$  are shown. Total reflect the total number of metabolites / genes within a pathway. Hits represent the number of metabolites / genes identified within our dataset.
